# Supplementary material for: SUMO-Activating Enzyme Subunit 1 (SAE1) Is a Promising Diagnostic Cancer Metabolism Biomarker of Hepatocellular Carcinoma
Source: PubMed Central journal article supplement (PMC7830456; doi:10.3390/cells10010178), 2021-01-17
Supplement: cells-10-00178-s001.pdf [file cells-10-00178-s001.pdf]

## SUPPLEMENTARY INFORMATION

### **SUMO-Activating Enzyme Subunit 1 (SAE1) is a Promising Diagnostic Cancer Metabolism Biomarker of Hepatocellular Carcinoma**

Jiann Ruey Ong<sup>1,2,3#</sup>, Oluwaseun Adebayo Bamodu<sup>4#</sup>, Nguyen Viet Khang<sup>4</sup>, Yen-Kuang Lin<sup>4</sup>, Chi-Tai Yeh<sup>4,5</sup>, Wei-Hwa Lee<sup>6</sup> and Yih-Giun Cherng<sup>7,8\*</sup>

1 Department of Emergency Medicine, Shuang-Ho Hospital-Taipei Medical University, New Taipei City, Taiwan.

2 Graduate institute of injury prevention and control, Taipei Medical University, Taipei, Taiwan.

3 Department of Emergency Medicine, School of Medicine, Taipei Medical University, Taipei, Taiwan.

4 Department of Medical Research & Education, Taipei Medical University - Shuang Ho Hospital, New Taipei City, 235, Taiwan.

5 Department of Medical Laboratory Science and Biotechnology, Yuanpei University of Medical Technology, Hsinchu 300, Taiwan.

6 Department of Pathology, Taipei Medical University-Shuang Ho Hospital, New Taipei City, Taiwan

7 Department of Anesthesiology, Shuang Ho Hospital, Taipei Medical University, New Taipei City, Taiwan.

8 Department of Anesthesiology, School of Medicine, College of Medicine, Taipei Medical University, Taipei, Taiwan.

# These authors have contributed equally to this work

\* Correspondence:

Dr. Yih-Giun Cherng, MD

Department of Anesthesiology, Shuang Ho Hospital, Taipei Medical University, New Taipei City, Taiwan. No. 291, Zhongzheng Road, Zhonghe District, New Taipei City, Taiwan 235

Email: [stainless@s.tmu.edu.tw](mailto:stainless@s.tmu.edu.tw)

Tel.: +886-2-2490088 ext. 8885

**Supplementary Table S1.** Specific primary antibodies of western blot in this study.

---

| No. | Target    | Dilution |          | Source         |
|-----|-----------|----------|----------|----------------|
| 1   | SAE1      | 1:1000   | #13585S  | Cell Signaling |
| 2   | CDK4      | 1:1000   | #2906    | Cell Signaling |
| 3   | Cyclin B1 | 1:500    | Sc-245   | Santa Cruz     |
| 4   | FOXO1     | 1:1000   | #2880    | Cell Signaling |
| 5   | KLF9      | 1:1000   | ab227920 | Abcam          |
| 6   | GAPDH     | 1:500    | Sc-47724 | Santa Cruz     |

---

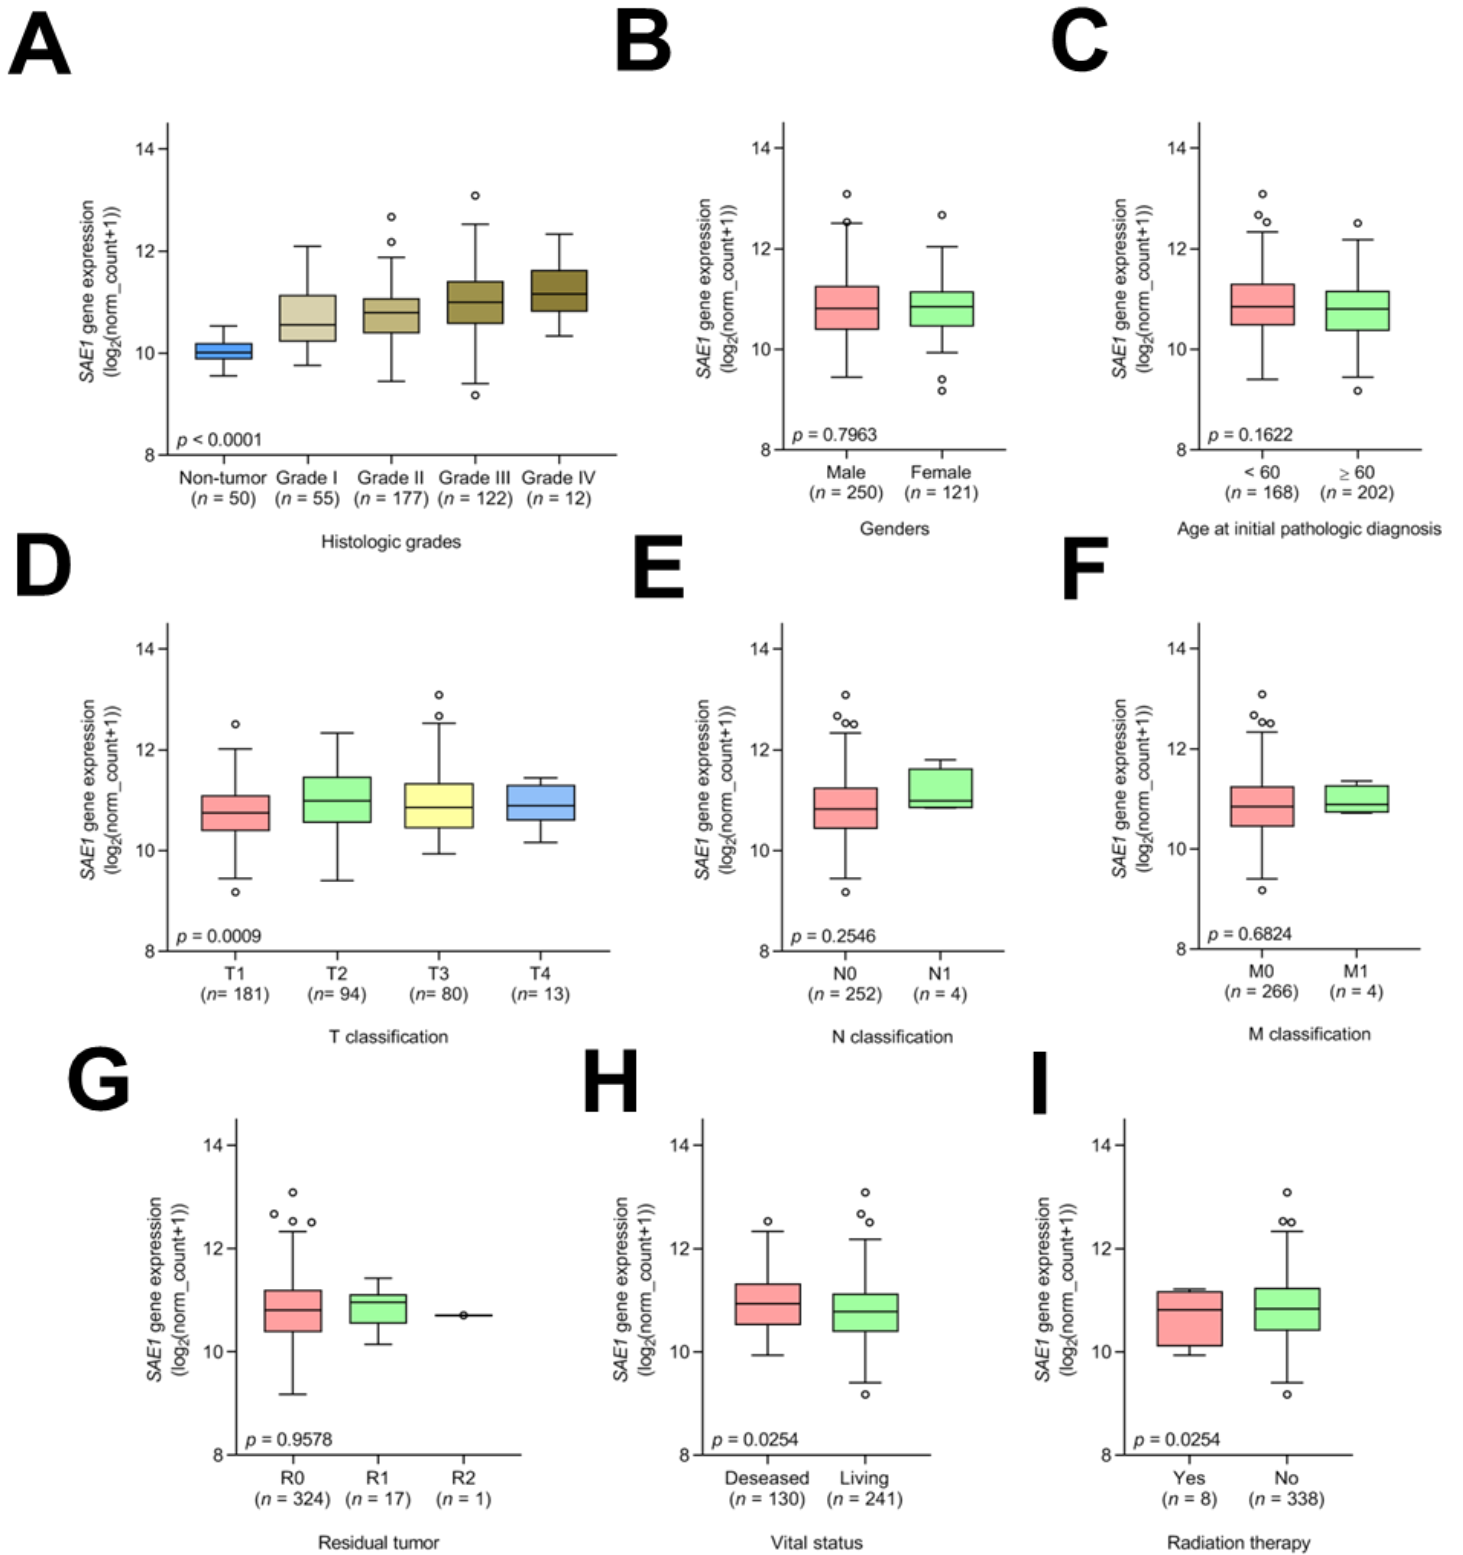

**Supplementary Figure S1.** SAE1 gene expression in HCC. Boxplots showing the mRNA expression levels of SAE1 according to histologic grade (A), genders (B), age at initial pathologic diagnosis (C), TNM classification (D-F), residual tumor (G), vital status (H) and radiation therapy (I).

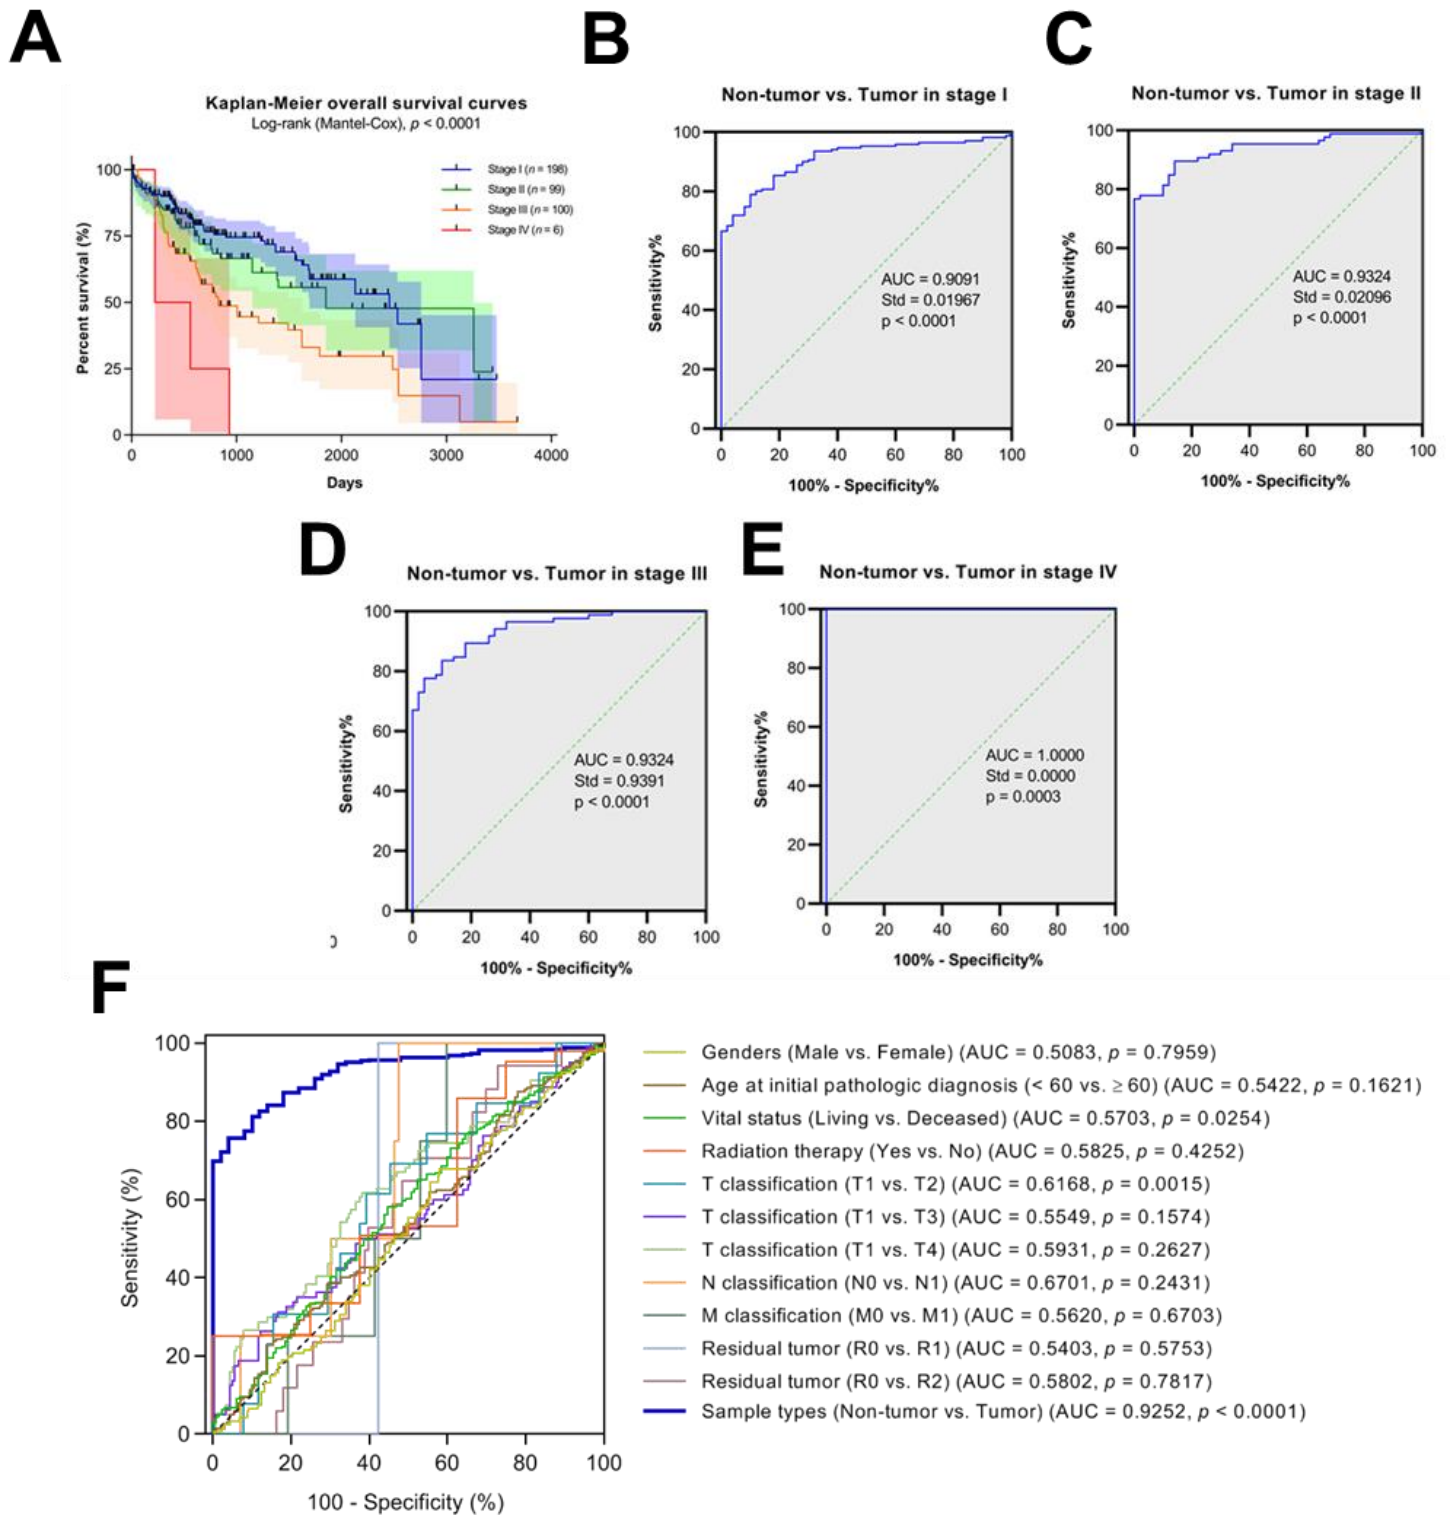

**Supplementary Figure S2.** Kaplan-Meier survival and ROC curves of SAE1 prognostic signature. (A) Kaplan-Meier curves of overall survival according to HCC pathologic stages. (B-E) ROC analysis of SAE1 expression in non-tumor versus tumor in stages I, II, III and IV. (F) ROC analysis of SAE1 expression characterized by various clinicopathological factors.

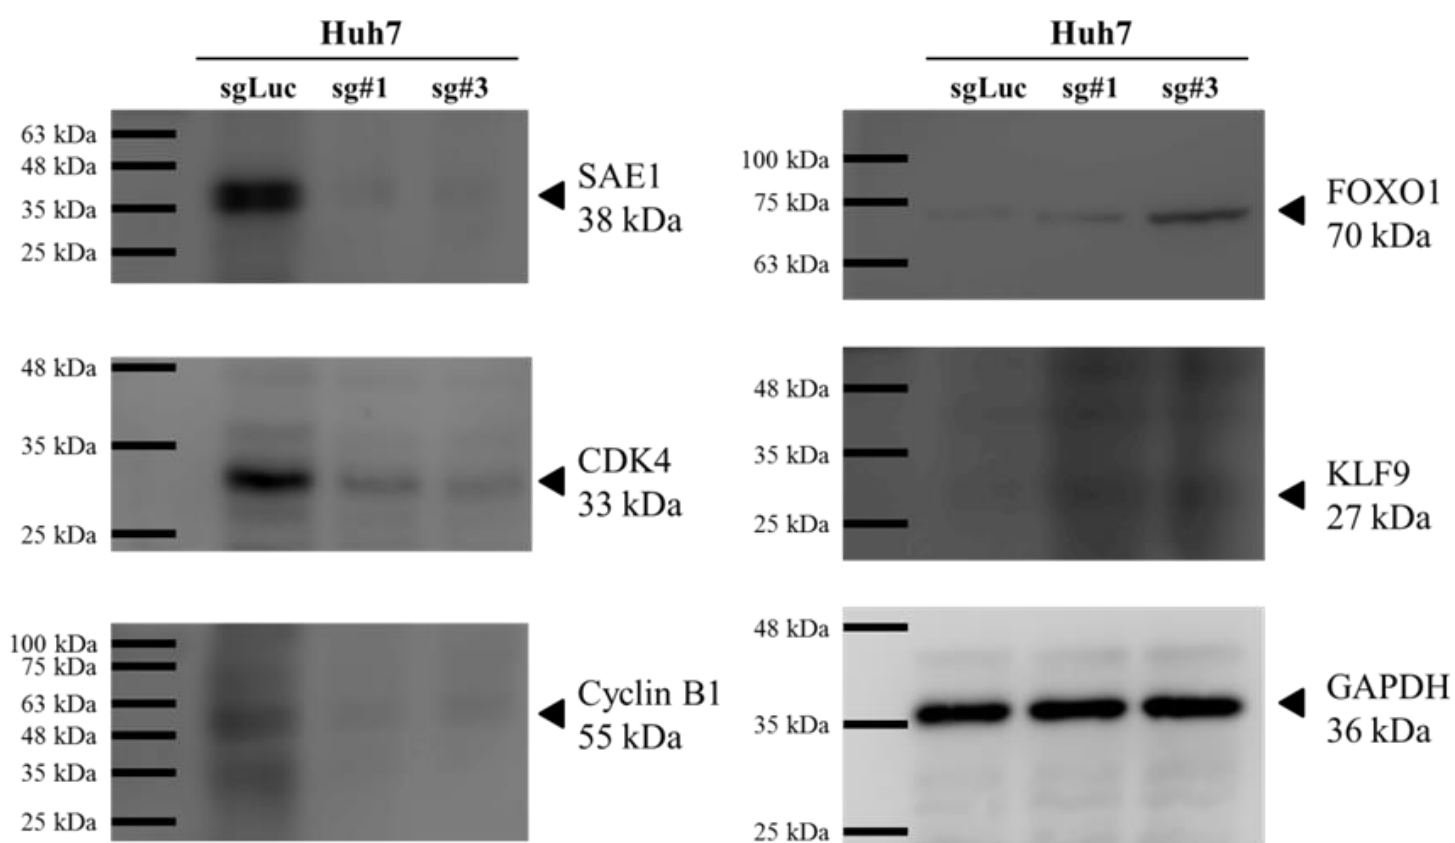

**Supplementary Figure S3.** Full-size blots of Figure 5E.
